# Supplementary material
Source: publisher figshare collection journal article supplement (https://tandf.figshare.com/ndownloader/files/31585549)
Supplement: Supplementary file 1 [file 31585549]

**Supplemental material**

**Figure S1**

*Scatterplots of correlations between peritraumatic dissociation and other peritraumatic responses*

*
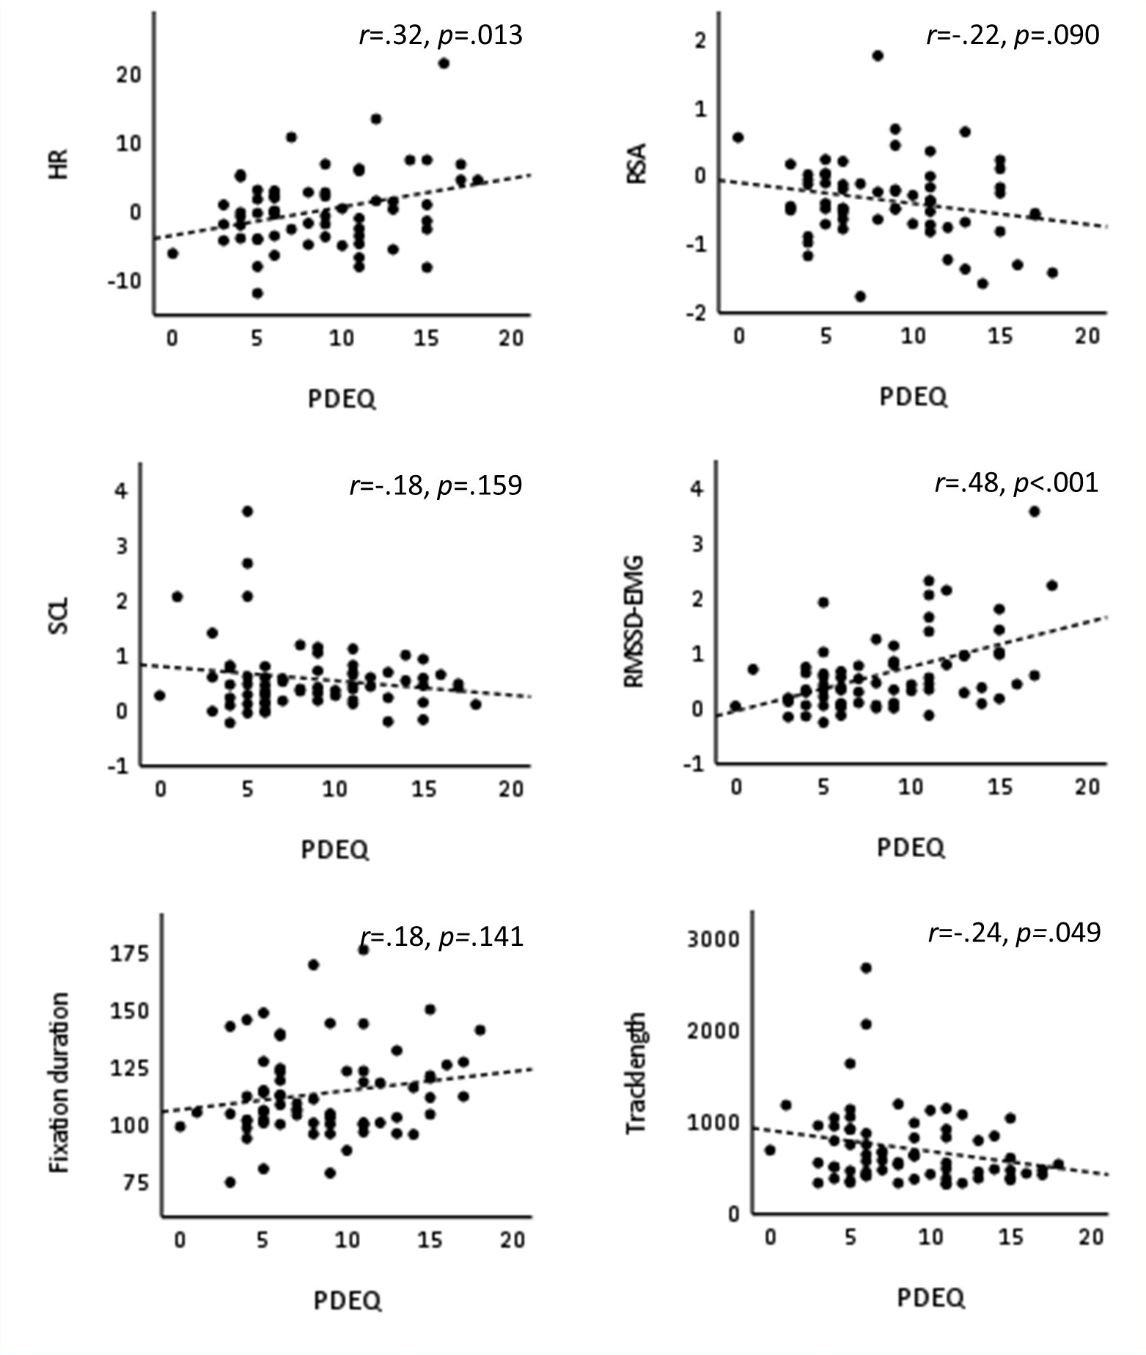
*

*Note.* For HR, RSA, SCL, and RMSSD-EMG, baseline-adjusted values were used. For sample sizes see Table 2. PDEQ=Peritraumatic Dissociative Experiences Questionnaire; HR=heart rate; RSA=respiratory sinus arrhythmia; SCL=skin conductance level; RMSSD-EMG=root mean squared successive differences of electromyography-signal amplitude.

**Figure S2**

*Scatterplot of correlation between peritraumatic dissociation and intrusion formation (N=67)*

*
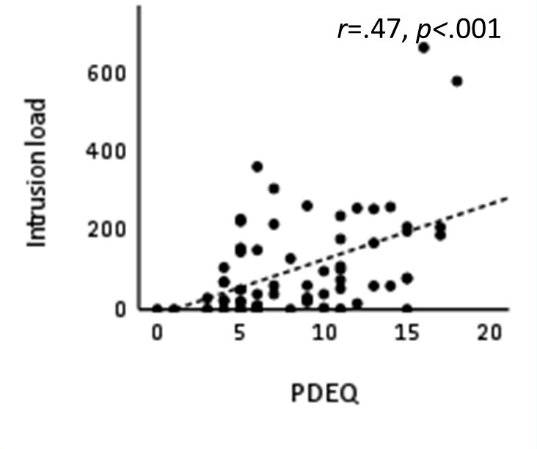
*

*Note.* PDEQ=Peritraumatic Dissociative Experiences Questionnaire.

**Figure S3**

*Scatterplots of correlations between other peritraumatic responses and intrusion formation*

*
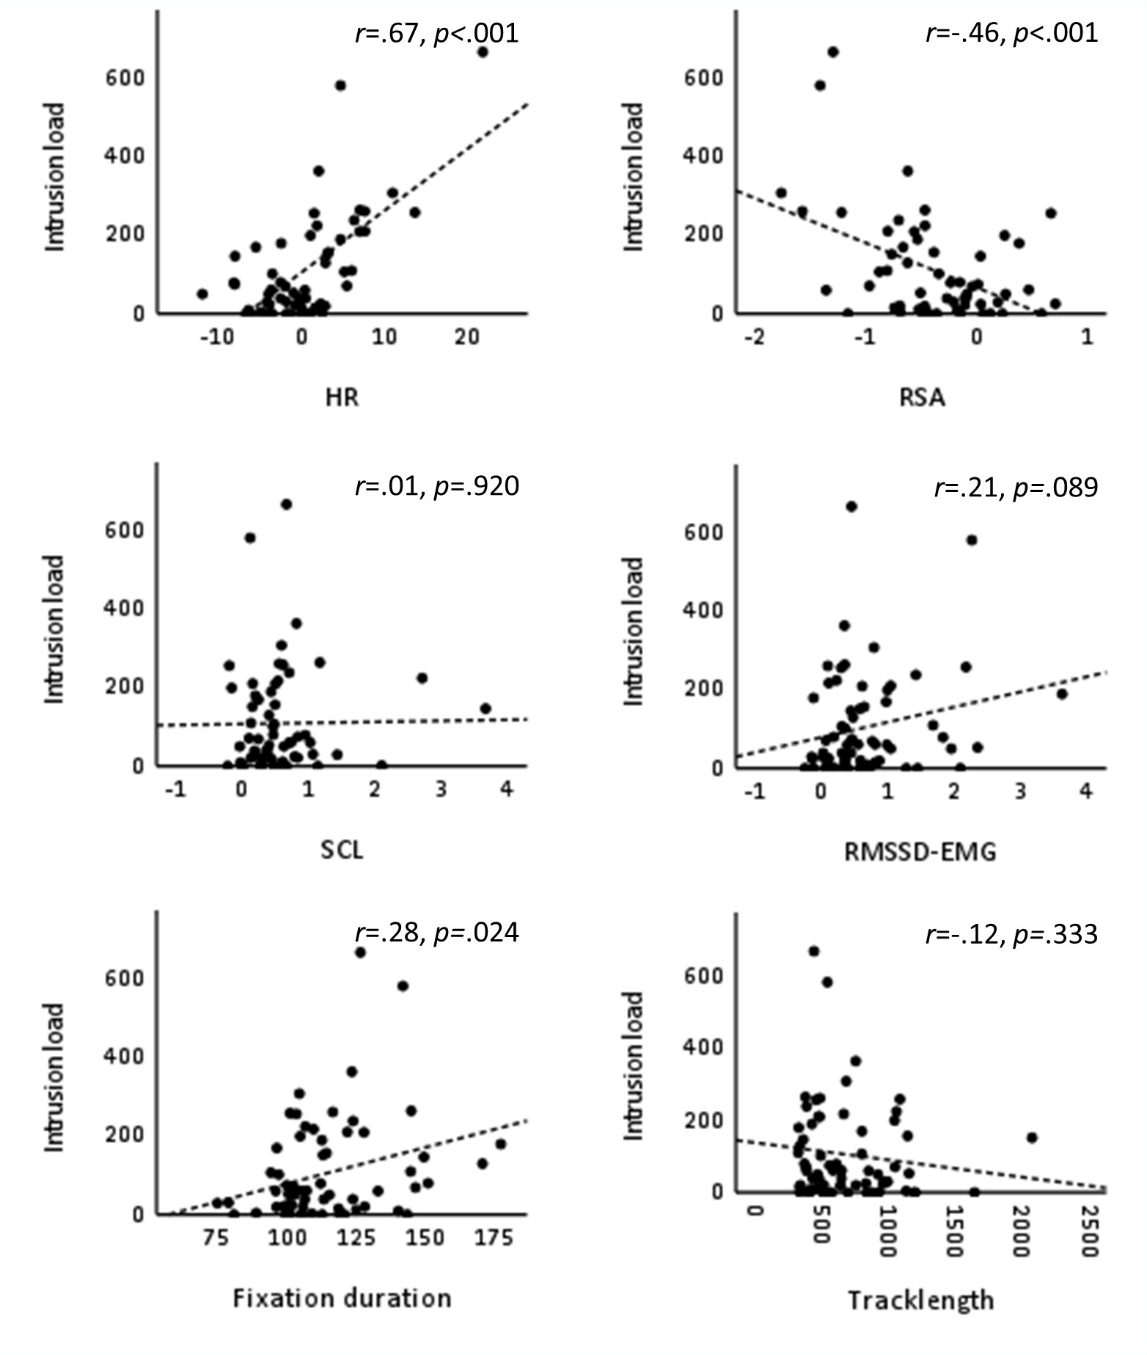
*

*Note.* For HR, RSA, SCL, and RMSSD-EMG, baseline-adjusted values were used. For sample sizes see Table 3. HR=heart rate; RSA=respiratory sinus arrhythmia; SCL=skin conductance level; RMSSD-EMG=root mean squared successive differences of electromyography-signal amplitude.

**Table S1**

*Predictive value of peritraumatic responses for intrusion load (N = 58)*

|  | *b* | *β* | *SE (HC3)* | *t* | *p* | 95% CI |
| --- | --- | --- | --- | --- | --- | --- |
| PDEQ | 9.53 | .30 | 4.19 | 2.28 | .027* | [1.12, 17.93] |
| HR | 13.18 | .55 | 4.48 | 2.94 | .005** | [4.18, 22.17] |
| RSA | -9.26 | -.04 | 38.67 | -0.24 | .812 | [-86.94, 68.42] |
| SCL | 37.91 | .18 | 18.01 | 2.11 | .040* | [1.74, 74.08] |
| RMSSD-EMG | 3.34 | .02 | 23.02 | 0.15 | .885 | [-42.90, 49.58] |
| Mean fixation duration | 1.30 | .20 | 0.67 | 1.93 | .060+ | [-0.05, 2.65] |
| Tracklength | 0.04 | .10 | 0.03 | 1.16 | .252 | [-0.03, 0.11] |
| *Note.* For HR, RSA, SCL, and RMSSD-EMG, baseline-adjusted values were used. A heteroscedasticity consistent standard error estimator (HC3) was used. PDEQ=Peritraumatic Dissociative Experiences Questionnaire; HR=heart rate; RSA=respiratory sinus arrhythmia; SCL=skin conductance level; RMSSD-EMG=root mean squared successive differences of electromyography-signal amplitude.  +*p*≤.10, **p*≤.05, ***p*≤.01, ****p*≤.001. | | | | | | |

**Table S2**

*Pearson correlations between peritraumatic responses and intrusion frequency*

|  | *N* | *r* | *p* | 95% BCa CI |
| --- | --- | --- | --- | --- |
| Dissociation |  |  |  |  |
| PDEQ | 67 | .20 | .11 | [-0.07, 0.46] |
|  |  |  |  |  |
| Autonomic activation |  |  |  |  |
| HR | 58 | .58 | <.001*** | [0.36, 0.74] |
| RSA | 58 | -.39 | .002** | [-0.60, -0.16] |
| SCL | 62 | -.01 | .956 | [-0.23, 0.22] |
|  |  |  |  |  |
| Facial movements |  |  |  |  |
| RMSSD-EMG | 65 | .16 | .195 | [-0.08, 0.42] |
|  |  |  |  |  |
| Staring |  |  |  |  |
| Fixation duration | 65 | .18 | .154 | [-0.09, 0.44] |
| Tracklength | 65 | -.00 | .989 | [-0.28, 0.26] |
| *Note.* For HR, RSA, SCL, and RMSSD-EMG, baseline-adjusted values were used. Confidence intervals are based on 10,000 bootstrap samples. BCa CI = bias corrected accelerated confidence intervals; PDEQ=Peritraumatic Dissociative Experiences Questionnaire; HR=heart rate; RSA=respiratory sinus arrhythmia; SCL=skin conductance level; RMSSD-EMG=root mean squared successive differences of electromyography-signal amplitude.  +*p*≤.10, **p*≤.05, ***p*≤.01, ****p*≤.001. | | | | |

**Table S3**

*Pearson correlations between peritraumatic responses and intrusion distress*

|  | *N* | *r* | *p* | 95% BCa CI |
| --- | --- | --- | --- | --- |
| Dissociation |  |  |  |  |
| PDEQ | 67 | .49 | <.001*** | [0.28, 0.67] |
|  |  |  |  |  |
| Autonomic activation |  |  |  |  |
| HR | 58 | .27 | .039* | [0.00, 0.51] |
| RSA | 58 | -.12 | .377 | [-0.39, 0.17] |
| SCL | 62 | .07 | .594 | [-0.22, 0.31] |
|  |  |  |  |  |
| Facial movements |  |  |  |  |
| RMSSD-EMG | 65 | .16 | .219 | [-0.10, 0.38] |
|  |  |  |  |  |
| Staring |  |  |  |  |
| Fixation duration | 65 | .21 | .094 | [-0.02, 0.40] |
| Tracklength | 65 | -.16 | .206 | [-0.36, 0.06] |
| *Note.* For HR, RSA, SCL, and RMSSD-EMG, baseline-adjusted values were used. Confidence intervals are based on 10,000 bootstrap samples. BCa CI = bias corrected accelerated confidence intervals; PDEQ=Peritraumatic Dissociative Experiences Questionnaire; HR=heart rate; RSA=respiratory sinus arrhythmia; SCL=skin conductance level; RMSSD-EMG=root mean squared successive differences of electromyography-signal amplitude.  +*p*≤.10, **p*≤.05, ***p*≤.01, ****p*≤.001. | | | | |
